# Supplementary material for: Health-seeking behaviours in a malaria endemic district in Lao People’s Democratic Republic: a mixed methods study
Source: HighWire-hosted journal article supplement (doi:10.1136/bmjopen-2021-055350), 2021-12-01
Supplement: bmjopen-2021-055350supp004_data_supplement.pdf [file bmjopen-2021-055350supp004_data_supplement.pdf]

**Supplementary 4 Characteristics of the healthcare workers in the in-depth interviews**

| No. | Village | Content                      | Unique ID | Age | Sex    |
|-----|---------|------------------------------|-----------|-----|--------|
| 1   | A       | Healthcare worker IDI        | BH1       | 30s | Female |
| 2   | A       | Healthcare worker IDI        | BH2       | 40s | Female |
| 3   | A       | Village Health Volunteer IDI | BV1       | 50s | Male   |
| 4   | B       | Healthcare worker IDI        | NH1       | 30s | Male   |
| 5   | B       | Healthcare worker IDI        | NH2       | 20s | Female |
| 6   | B       | Healthcare worker IDI        | NH3       | 30s | Female |
| 7   | B       | Village Health Volunteer IDI | NV1       | 50s | Male   |
